# Supplementary material
Source: publisher figshare collection journal article supplement (https://acs.figshare.com/ndownloader/files/25855552)
Supplement: Supplementary file 1 [file 25855552]

## Sheet: Supplementary data file 3_F-MWC
Ligand:
Pharma Model	Num Feature	Fit	Norm Fit	Num Hydrophobic	Num HB Acceptor	Num HB Donor	Num Positive	Num Negative	Num Aromatic	Name	Class	Uniplot	Function	Disease	Idication
2wb1_D_cavity_1	3	2.999	0.9998	3	0	0	0	0	0	NONE	NONE	NONE	NONE	NONE	NONE
2i15_A_cavity_3	3	2.999	0.9996	3	0	0	0	0	0	Uncharacterized protein MG296 homolog	NONE	P75364	NONE	NONE	NONE
3epy_B_cavity_1	3	2.998	0.9995	3	0	0	0	0	0	Acyl-CoA-binding domain-containing protein 7	NONE	Q8N6N7	NONE	NONE	NONE
1cqa_A_cavity_1	3	2.998	0.9993	3	0	0	0	0	0	Profilin	NONE	P25816	NONE	NONE	NONE
1u2w_C_cavity_1	3	2.998	0.9992	3	0	0	0	0	0	Cadmium efflux system accessory protein	NONE	P20047	NONE	NONE	NONE
3hd5_B_cavity_2	3	2.997	0.9991	3	0	0	0	0	0	Thio	NONE	Q7W2Q0	NONE	NONE	NONE
1v5v_B_cavity_2	3	2.997	0.9988	3	0	0	0	0	0	Probable aminomethyltransferase	NONE	O58888	NONE	NONE	NONE
1i0s_A_cavity_2	3	2.996	0.9986	3	0	0	0	0	0	Hypothetical protein	NONE	O29428	Involved in oxidoreductase activity	NONE	NONE
3ce6_B_cavity_1	3	2.995	0.9982	3	0	0	0	0	0	Adenosylhomocysteinase	NONE	P60176	NONE	NONE	NONE
2pjw_H_cavity_2	3	2.994	0.9982	3	0	0	0	0	0	Class E vacuolar protein-sorting machinery protein HSE1	NONE	P38753	NONE	NONE	NONE
1roz_A_cavity_4	3	2.994	0.998	3	0	0	0	0	0	Deoxyhypusine synthase	TRANSFERASE	DHYS_HUMAN	Catalyzes the NAD-dependent oxidative cleavage of spermidine and the subsequent transfer of the butylamine moiety of spermidine to the epsilon-amino group of a specific lysine residue of the eIF-5A precursor protein to form the intermediate deoxyhypusine	NONE	NONE
1nlm_A_cavity_2	3	2.994	0.9979	3	0	0	0	0	0	UDP-N-acetylglucosamine--N-acetylmuramyl-(pentapeptide) pyrophosphoryl-undecaprenol N-acetylglucosamine transferase	NONE	P17443	Cell wall/membrane/envelope biogenesis	NONE	NONE
1pjr_A_cavity_5	3	2.989	0.9964	3	0	0	0	0	0	ATP-dependent DNA helicase pcrA	NONE	P56255	NONE	NONE	NONE
1ggz_A_cavity_1	3	2.989	0.9963	3	0	0	0	0	0	Calmodulin-like protein 3	NONE	P27482	NONE	NONE	NONE
1ukk_A_cavity_2	3	2.988	0.9959	3	0	0	0	0	0	Osmotically inducible protein C	NONE	P84124	Posttranslational modification, protein turnover, chaperones	NONE	NONE
3euk_E_cavity_1	3	2.987	0.9957	3	0	0	0	0	0	Chromosome partition protein mukB	NONE	Q7VL96	NONE	NONE	NONE
1evy_A_cavity_2	3	2.986	0.9953	3	0	0	0	0	0	Glycerol-3-phosphate dehydrogenase [NAD+], glycosomal	NONE	P90551	Involved in oxidoreductase activity	NONE	NONE
1qzt_A_cavity_1	3	2.985	0.9952	3	0	0	0	0	0	Phosphate acetyltransferase	NONE	P38503	NONE	NONE	NONE
1e0y_B_cavity_6	3	2.985	0.9951	3	0	0	0	0	0	Vanillyl-alcohol oxidase	NONE	P56216	Energy production and conversion	NONE	NONE
1vli_A_cavity_4	3	2.985	0.9951	3	0	0	0	0	0	Spore coat polysaccharide biosynthesis protein spsE	NONE	P39625	NONE	NONE	NONE
3c6g_B_cavity_3	3	2.985	0.995	3	0	0	0	0	0	Vitamin D 25-hydroxylase	OXIDOREDUCTASE	CP2R1_HUMAN	Has a D-25-hydroxylase activity on both forms of vitamin D, vitamin D(2) and D(3).	Defects in CYP2R1 are a cause of 25-hydroxyvitamin D(3) deficiency [MIM:600081]; also known as pseudovitamin D(3) deficiency rickets due to 25-hydroxylase deficiency. First described in patients who had rickets at a young age despite a history of adequate vitamin D intake. The patients sera had low calcium concentrations, low phosphate concentrations, elevated alkaline phosphatase activity, and l…	NONE
1by1_A_cavity_1	3	2.984	0.9948	3	0	0	0	0	0	Rho guanine nucleotide exchange factor 7	TRANSPORT PROTEIN	ARHG7_HUMAN	Acts as a RAC1 guanine nucleotide exchange factor (GEF) and can induce membrane ruffling (By similarity).	NONE	NONE
2kdd_B_cavity_1	3	2.984	0.9947	3	0	0	0	0	0	Borealin	NONE	Q53HL2	NONE	NONE	NONE
2a7s_A_cavity_5	3	2.982	0.994	3	0	0	0	0	0	Probable propionyl-CoA carboxylase beta chain 5	NONE	P96885	NONE	NONE	NONE
3duz_A_cavity_3	3	2.981	0.9938	3	0	0	0	0	0	Major envelope glycoprotein	NONE	P17501	NONE	NONE	NONE
1e5p_A_cavity_1	3	2.979	0.993	3	0	0	0	0	0	Aphrodisin	NONE	P09465	NONE	NONE	NONE
2ziw_A_cavity_1	3	2.978	0.9926	3	0	0	0	0	0	Crossover junction endonuclease MUS81	NONE	Q7SXA9	NONE	NONE	NONE
1t0t_Z_cavity_2	3	2.977	0.9924	3	0	0	0	0	0	UPF0447 protein GK3416	NONE	Q5KUD5	NONE	NONE	NONE
2oqc_A_cavity_2	3	2.969	0.9896	3	0	0	0	0	0	Uncharacterized protein yxeI	NONE	P54948	NONE	NONE	NONE
1wy5_B_cavity_4	3	2.969	0.9896	3	0	0	0	0	0	tRNA(Ile)-lysidine synthase	NONE	O67728	NONE	NONE	NONE
2ix4_A_cavity_3	4	3.905	0.9763	4	0	0	0	0	0	3-oxoacyl-[acyl-carrier-protein] synthase, mitochondrial	NONE	Q8L3X9	NONE	NONE	NONE
3b8c_B_cavity_7	4	3.868	0.9671	4	0	0	0	0	0	ATPase 2, plasma membrane-type	NONE	P19456	NONE	NONE	NONE
1ku5_A_cavity_1	4	3.81	0.9526	4	0	0	0	0	0	Archaeal histone A	NONE	O74098	Involved in sequence-specific DNA binding	NONE	NONE
2inr_A_cavity_2	4	3.752	0.938	4	0	0	0	0	0	DNA topoisomerase 4 subunit A	NONE	Q6G9K4	NONE	NONE	NONE
1r6r_B_cavity_1	4	3.715	0.9288	4	0	0	0	0	0	Genome polyprotein	NONE	P12823	Involved in nucleic acid binding	NONE	NONE
1mkm_A_cavity_2	4	3.683	0.9207	4	0	0	0	0	0	Transcriptional regulator, IclR family	NONE	Q9WXS0	Involved in DNA binding	NONE	NONE
1vb6_B_cavity_1	4	3.68	0.92	4	0	0	0	0	0	Heme-regulated cyclic AMP phosphodiesterase	NONE	P76129	Involved in signal transducer activity	NONE	NONE
1xke_A_cavity_1	4	3.677	0.9192	4	0	0	0	0	0	E3 SUMO-protein ligase RanBP2	NONE	P49792	NONE	NONE	NONE
1jfi_A_cavity_1	4	3.671	0.9177	4	0	0	0	0	0	Dr1-associated corepressor	NONE	Q14919	NONE	NONE	NONE
2qtz_A_cavity_3	4	3.657	0.9141	4	0	0	0	0	0	Methionine synthase reductase, mitochondrial	NONE	Q9UBK8	NONE	NONE	NONE
1zrt_C_cavity_6	4	3.652	0.913	4	0	0	0	0	0	Ubiquinol-cytochrome c reductase iron-sulfur subunit	NONE	P08500	NONE	NONE	NONE
1sh4_A_cavity_1	4	3.651	0.9128	4	0	0	0	0	0	Cytochrome b5	NONE	P00171	NONE	NONE	NONE
2yxr_A_cavity_3	4	3.647	0.9118	4	0	0	0	0	0	Preprotein translocase subunit secY	NONE	Q60175	NONE	NONE	NONE
2dqn_A_cavity_2	4	3.627	0.9068	4	0	0	0	0	0	Glutamyl-tRNA(Gln) amidotransferase subunit A	NONE	P63488	NONE	NONE	NONE
1w5a_A_cavity_2	4	3.603	0.9007	4	0	0	0	0	0	Cell division protein ftsZ homolog 1	NONE	Q57816	Cell cycle control, cell division, chromosome partitioning	NONE	NONE
1ieb_A_cavity_1	4	3.582	0.8956	4	0	0	0	0	0	H-2 class II histocompatibility antigen, E-D alpha chain	NONE	P01904	NONE	NONE	NONE
2c9o_B_cavity_3	4	3.581	0.8952	4	0	0	0	0	0	RuvB-like 1	NONE	Q9Y265	NONE	NONE	NONE
1tyb_E_cavity_2	4	3.542	0.8856	4	0	0	0	0	0	Tyrosyl-tRNA synthetase	NONE	P00952	NONE	NONE	NONE
1osa_A_cavity_2	4	3.538	0.8845	4	0	0	0	0	0	Calmodulin	NONE	P07463	Involved in calcium ion binding	NONE	NONE
1fft_C_cavity_1	4	3.523	0.8807	4	0	0	0	0	0	Ubiquinol oxidase subunit 1	NONE	P0ABI8	NONE	NONE	NONE
1ljp_A_cavity_1	4	3.522	0.8805	4	0	0	0	0	0	Beta-elicitin cinnamomin	NONE	P15569	NONE	NONE	NONE
2v3c_D_cavity_4	4	3.518	0.8795	4	0	0	0	0	0	Signal recognition particle 19 kDa protein	NONE	Q58440	NONE	NONE	NONE
1e00_A_cavity_1	4	3.5	0.8749	4	0	0	0	0	0	Odorant-binding protein	NONE	P81245	This protein is found in nasal epithelium and it binds a wide variety of chemical odorants.	NONE	NONE
2cr7_A_cavity_2	4	3.499	0.8747	4	0	0	0	0	0	Paired amphipathic helix protein Sin3b	NONE	Q62141	NONE	NONE	NONE
2hgk_A_cavity_2	4	3.496	0.874	4	0	0	0	0	0	Uncharacterized protein yqcC	NONE	Q46919	NONE	NONE	NONE
1j3n_B_cavity_1	4	3.479	0.8698	4	0	0	0	0	0	Transferase	NONE	Q7SIC5	Involved in catalytic activity	NONE	NONE
3hki_E_cavity_1	4	3.479	0.8698	4	0	0	0	0	0	Prothrombin	NONE	P19221	NONE	NONE	NONE
2pka_X_cavity_1	4	3.437	0.8591	4	0	0	0	0	0	Glandular kallikrein	NONE	P00752	NONE	NONE	NONE
1r1t_B_cavity_1	4	3.411	0.8527	4	0	0	0	0	0	Transcriptional repressor smtB	NONE	P30340	NONE	NONE	NONE
2wdv_G_cavity_3	4	3.408	0.852	4	0	0	0	0	0	Succinate dehydrogenase flavoprotein subunit	NONE	P0AC41	Involved in oxidoreductase activity	NONE	NONE
2fm8_A_cavity_1	4	3.408	0.852	4	0	0	0	0	0	Surface presentation of antigens protein spaK	NONE	P0A1N0	NONE	NONE	NONE
2k9p_A_cavity_1	4	3.407	0.8517	4	0	0	0	0	0	Pheromone alpha factor receptor	NONE	P06842	NONE	NONE	NONE
3fwc_A_cavity_2	4	3.405	0.8512	4	0	0	0	0	0	Cell division control protein 31	NONE	P06704	NONE	NONE	NONE
2jub_A_cavity_1	4	3.403	0.8507	4	0	0	0	0	0	Internal protein I	NONE	P03718	NONE	NONE	NONE
2ew0_A_cavity_1	4	3.388	0.847	4	0	0	0	0	0	UPF0301 protein ACIAD0353	NONE	Q6FF54	NONE	NONE	NONE
1xio_A_cavity_1	4	3.387	0.8468	4	0	0	0	0	0	Bacteriorhodopsin	NONE	Q8YSC4	Involved in ion channel activity	NONE	NONE
1yf6_L_cavity_1	5	4.214	0.8427	5	0	0	0	0	0	Reaction center protein H chain	NONE	P0C0Y7	NONE	NONE	NONE
1ig3_A_cavity_1	4	3.368	0.842	4	0	0	0	0	0	Thiamin pyrophosphokinase 1	NONE	Q9H3S4	Coenzyme transport and metabolism	NONE	For the treatment of thiamine and niacin deficiency states, Korsakovs alcoholic psychosis, Wernicke-Korsakov syndrome, delirium, and peripheral neuritis.
1lj0_C_cavity_1	4	3.366	0.8415	4	0	0	0	0	0	Cytochrome b5 type B	NONE	P04166	Involved in heme binding	NONE	NONE
1taf_A_cavity_2	4	3.332	0.833	4	0	0	0	0	0	Transcription initiation factor TFIID subunit 9	NONE	Q27272	NONE	NONE	NONE
1d06_A_cavity_1	4	3.278	0.8195	4	0	0	0	0	0	Sensor protein fixL	NONE	P10955	Involved in ATP binding	NONE	NONE
3bxz_A_cavity_7	4	3.264	0.816	4	0	0	0	0	0	Protein translocase subunit secA	NONE	P10408	NONE	NONE	NONE
2a2g_D_cavity_1	4	3.211	0.8028	4	0	0	0	0	0	Major urinary protein	NONE	P02761	Involved in phermone binding	NONE	NONE
1gmg_B_cavity_1	4	3.147	0.7866	4	0	0	0	0	0	Regulatory protein rop	NONE	P03051	Regulates plasmid DNA replication by modulating the initiation of transcription of the primer RNA precursor. Processing of the precursor of the primer, RNAII, is inhibited by hydrogen bonding of RNAII to its complementary sequence in RNAI. ROP increases the affinity of RNAI for RNAII and thus decreases the rate of replication initiation events	NONE	NONE
1ud9_A_cavity_1	4	3.141	0.7853	4	0	0	0	0	0	DNA polymerase sliding clamp A	NONE	Q975N2	NONE	NONE	NONE
1yaa_A_cavity_1	4	3.134	0.7836	4	0	0	0	0	0	Aspartate aminotransferase, cytoplasmic	NONE	P23542	Involved in transferase activity, transferring nitrogenous groups	NONE	NONE
2os6_A_cavity_1	5	3.916	0.7832	5	0	0	0	0	0	Rho guanine nucleotide exchange factor 12	CELL ADHESION	ARHGC_HUMAN	May play a role in the regulation of RhoA GTPase by guanine nucleotide-binding alpha-12 (GNA12) and alpha-13 (GNA13). Acts as guanine nucleotide exchange factor (GEF) for RhoA GTPase and may act as GTPase-activating protein (GAP) for GNA12 and GNA13.	A chromosomal aberration involving ARHGEF12 may be a cause of acute leukemia. Translocation t(11;11)(q23;23) with MLL.	NONE
2tpr_B_cavity_3	5	3.893	0.7787	5	0	0	0	0	0	Trypanothione reductase	NONE	P39040	Energy production and conversion	NONE	NONE
1b0a_A_cavity_2	5	3.892	0.7785	5	0	0	0	0	0	Bifunctional protein folD	NONE	P24186	NONE	NONE	NONE
1oqp_A_cavity_1	4	3.112	0.7779	4	0	0	0	0	0	Caltractin	NONE	P05434	NONE	NONE	NONE
2ay0_E_cavity_1	5	3.868	0.7736	5	0	0	0	0	0	Bifunctional protein putA	NONE	P09546	Energy production and conversion	NONE	NONE
1r8u_A_cavity_1	5	3.864	0.7728	5	0	0	0	0	0	Cbp/p300-interacting transactivator 2	TRANSCRIPTION/TRANSCRIPTION ACTIVATOR	CITE2_HUMAN	Interferes with the binding of transcription factors HIF-1a and STAT2 to p300/CBP.	NONE	NONE
1b8h_B_cavity_1	5	3.827	0.7655	5	0	0	0	0	0	DNA polymerase processivity component	NONE	O80164	NONE	NONE	NONE
1tnq_A_cavity_1	5	3.806	0.7613	5	0	0	0	0	0	Troponin C, skeletal muscle	NONE	P02588	Involved in calcium ion binding	NONE	NONE
2gj3_B_cavity_1	5	3.8	0.7601	5	0	0	0	0	0	Nitrogen fixation regulatory protein	NONE	P30663	NONE	NONE	NONE
1l0v_P_cavity_2	5	3.77	0.7539	5	0	0	0	0	0	Fumarate reductase flavoprotein subunit	OXIDOREDUCTASE	FRDA_ECOLI	Two distinct, membrane-bound, FAD-containing enzymes are responsible for the catalysis of fumarate and succinate interconversion; the fumarate reductase is used in anaerobic growth, and the succinate dehydrogenase is used in aerobic growth.	NONE	NONE
1xwr_D_cavity_1	5	3.759	0.7518	5	0	0	0	0	0	Regulatory protein CII	NONE	P03042	NONE	NONE	NONE
1n6b_A_cavity_1	5	3.745	0.749	5	0	0	0	0	0	Cytochrome P450 2C5	NONE	P00179	Involved in monooxygenase activity	NONE	NONE
1oy0_C_cavity_1	4	2.994	0.7486	3	0	0	1	0	0	3-methyl-2-oxobutanoate hydroxymethyltransferase	NONE	P0A5Q8	NONE	NONE	NONE
1m1b_B_cavity_4	4	2.977	0.7443	3	0	0	0	1	0	Phosphoenolpyruvate phosphomutase	NONE	P56839	Carbohydrate transport and metabolism	NONE	NONE
2gp6_B_cavity_1	5	3.72	0.744	5	0	0	0	0	0	3-oxoacyl-[acyl-carrier-protein] synthase 2	NONE	P63456	NONE	NONE	NONE
1nsh_B_cavity_1	5	3.69	0.7381	5	0	0	0	0	0	Protein S100-A11	NONE	P24480	NONE	NONE	NONE
3g9k_S_cavity_1	5	3.689	0.7378	5	0	0	0	0	0	Capsule biosynthesis protein capD	NONE	Q51693	NONE	NONE	NONE
1yhn_B_cavity_1	6	4.415	0.7359	6	0	0	0	0	0	Ras-related protein Rab-7a	NONE	P51149	NONE	NONE	NONE
2e9q_A_cavity_2	5	3.675	0.735	5	0	0	0	0	0	11S globulin subunit beta	NONE	P13744	NONE	NONE	NONE
2es0_A_cavity_1	5	3.672	0.7343	5	0	0	0	0	0	Regulator of G-protein signaling 6	SIGNALING PROTEIN	RGS6_HUMAN	Inhibits signal transduction by increasing the GTPase activity of G protein alpha subunits thereby driving them into their inactive GDP-bound form. Activity on G(o)-alpha is specifically enhanced by the RGS6/Gbeta5 dimer.	NONE	NONE
2bty_A_cavity_1	5	3.671	0.7343	5	0	0	0	0	0	Acetylglutamate kinase	NONE	Q9X2A4	NONE	NONE	NONE
1bsl_B_cavity_1	5	3.633	0.7265	4	0	0	0	1	0	Alkanal monooxygenase beta chain	NONE	P07739	NONE	NONE	NONE
1vrn_C_cavity_3	5	3.625	0.725	5	0	0	0	0	0	Photosynthetic reaction center cytochrome c subunit	NONE	P07173	NONE	NONE	NONE
2qby_A_cavity_4	5	3.6	0.72	5	0	0	0	0	0	Cell division control protein 6 homolog 1	NONE	Q980N4	NONE	NONE	NONE
2gfp_B_cavity_6	5	3.599	0.7198	5	0	0	0	0	0	Multidrug resistance protein D	NONE	P31442	NONE	NONE	NONE
2f8n_G_cavity_1	5	3.561	0.7123	5	0	0	0	0	0	Histone H3.2	NONE	P84233	NONE	NONE	NONE
1ku9_A_cavity_1	6	4.261	0.7102	5	0	0	0	1	0	DNA-binding protein MJ1563	NONE	Q58958	NONE	NONE	NONE
3b6x_B_cavity_1	5	3.535	0.707	5	0	0	0	0	0	General odorant-binding protein lush	NONE	O02372	Involved in odorant binding	NONE	NONE
3df0_A_cavity_7	5	3.532	0.7064	5	0	0	0	0	0	Calpain-2 catalytic subunit	NONE	Q07009	NONE	NONE	NONE
1bh9_B_cavity_1	6	4.234	0.7057	6	0	0	0	0	0	Transcription initiation factor TFIID subunit 13	NONE	Q15543	NONE	NONE	NONE
1na6_A_cavity_3	5	3.528	0.7056	5	0	0	0	0	0	Type-2 restriction enzyme EcoRII	NONE	P14633	NONE	NONE	NONE
1vf5_B_cavity_2	5	3.518	0.7036	5	0	0	0	0	0	Cytochrome b6	NONE	P83791	Involved in oxidoreductase activity	NONE	NONE
2r0n_A_cavity_1	5	3.507	0.7014	5	0	0	0	0	0	Glutaryl-CoA dehydrogenase, mitochondrial	NONE	Q92947	Lipid transport and metabolism	NONE	NONE
2fbw_Q_cavity_1	5	3.506	0.7011	5	0	0	0	0	0	Succinate dehydrogenase [ubiquinone] flavoprotein subunit, mitochondrial	NONE	Q9YHT1	NONE	NONE	NONE
1lbm_A_cavity_1	5	3.489	0.6978	4	1	0	0	0	0	N-(5-phosphoribosyl)anthranilate isomerase	NONE	Q56320	Involved in phosphoribosylanthranilate isomerase activity	NONE	NONE
1xes_A_cavity_1	5	3.451	0.6902	5	0	0	0	0	0	Dihydropinosylvin synthase	NONE	Q02323	NONE	NONE	NONE
2f66_E_cavity_1	6	4.075	0.6792	6	0	0	0	0	0	Suppressor protein STP22 of temperature-sensitive alpha-factor receptor and arginine permease	NONE	P25604	NONE	NONE	NONE
1xk0_A_cavity_1	7	4.717	0.6739	5	0	1	0	1	0	Heme oxygenase 1	OXIDOREDUCTASE	HMOX1_HUMAN	Heme oxygenase cleaves the heme ring at the alpha methene bridge to form biliverdin. Biliverdin is subsequently converted to bilirubin by biliverdin reductase. Under physiological conditions, the activity of heme oxygenase is highest in the spleen, where	NONE	Sepsis;Cancer
1fdy_B_cavity_2	6	4.033	0.6722	6	0	0	0	0	0	N-acetylneuraminate lyase	NONE	P0A6L4	Catalyzes the reversible aldol cleavage of N-acetylneuraminic acid (sialic acid; Neu5Ac) to form pyruvate and N-acetylmannosamine (ManNAc) via a Schiff base intermediate.	NONE	NONE
1id3_A_cavity_1	6	4.03	0.6717	6	0	0	0	0	0	Histone H3	NONE	P61830	NONE	NONE	NONE
1x65_A_cavity_1	6	4	0.6667	4	1	0	0	1	0	Cold shock domain-containing protein E1	NONE	O75534	NONE	NONE	NONE
2hyd_A_cavity_2	6	3.986	0.6643	6	0	0	0	0	0	Putative multidrug export ATP-binding/permease protein SAV1866	NONE	Q99T13	NONE	NONE	NONE
1kvo_D_cavity_1	5	3.318	0.6636	4	1	0	0	0	0	Phospholipase A2, membrane associated	NONE	P14555	Involved in phospholipase A2 activity	NONE	NONE
3hbx_D_cavity_2	6	3.975	0.6624	5	0	1	0	0	0	Glutamate decarboxylase 1	NONE	Q42521	NONE	NONE	NONE
1lnm_A_cavity_2	7	4.606	0.658	5	0	1	0	1	0	Bilin-binding protein	LIGAND BINDING PROTEIN	BBP_PIEBR	This protein binds the blue pigments bilins.	NONE	NONE
2if2_C_cavity_2	6	3.945	0.6575	5	1	0	0	0	0	Dephospho-CoA kinase	NONE	O67792	NONE	NONE	NONE
2hka_C_cavity_1	6	3.936	0.656	6	0	0	0	0	0	Epididymal secretory protein E1	NONE	P79345	NONE	NONE	NONE
1lss_B_cavity_1	7	4.591	0.6558	7	0	0	0	0	0	Trk system potassium uptake protein trkA homolog	NONE	Q58505	Involved in cation transmembrane transporter activity	NONE	NONE
2xat_A_cavity_2	6	3.933	0.6556	4	0	1	1	0	0	Chloramphenicol acetyltransferase	NONE	P26841	Involved in acyltransferase activity	NONE	Used in treatment of cholera, as it destroys the vibrios and decreases the diarrhea. It is effective against tetracycline-resistant vibrios. It is also used in eye drops or ointment to treat bacterial conjunctivitis.
2gk9_A_cavity_2	6	3.928	0.6547	6	0	0	0	0	0	Phosphatidylinositol-5-phosphate 4-kinase type-2 gamma	NONE	Q8TBX8	NONE	NONE	NONE
2fyn_M_cavity_1	7	4.577	0.6539	7	0	0	0	0	0	Cytochrome b	NONE	Q02761	NONE	NONE	NONE
1tg6_A_cavity_2	6	3.88	0.6466	4	1	0	0	1	0	Putative ATP-dependent Clp protease proteolytic subunit, mitochondrial	HYDROLASE	CLPP_HUMAN	Clp cleaves peptides in various proteins in a process that requires ATP hydrolysis. Clp may be responsible for a fairly general and central housekeeping function rather than for the degradation of specific substrates.	NONE	NONE
1wjt_A_cavity_1	6	3.845	0.6409	6	0	0	0	0	0	Transcription elongation factor A protein 3	NONE	P23881	NONE	NONE	NONE
2aao_A_cavity_1	6	3.837	0.6396	6	0	0	0	0	0	Calcium-dependent protein kinase 1	NONE	Q06850	NONE	NONE	NONE
1dos_A_cavity_1	6	3.836	0.6393	4	1	0	1	0	0	Fructose-bisphosphate aldolase class 2	NONE	P0AB71	Carbohydrate transport and metabolism	NONE	NONE
1ml8_A_cavity_1	6	3.834	0.639	6	0	0	0	0	0	Protein yhfA	NONE	P0ADX3	NONE	NONE	NONE
2jul_A_cavity_2	6	3.828	0.6379	6	0	0	0	0	0	Calsenilin	NONE	Q9QXT8	NONE	NONE	NONE
1wh0_A_cavity_1	6	3.807	0.6346	4	0	1	0	1	0	Ubiquitin carboxyl-terminal hydrolase 19	HYDROLASE	UBP19_HUMAN	Involved in the ubiquitin-dependent proteolytic pathway in conjunction with the 26S proteasome (By similarity).	NONE	NONE
1g0b_B_cavity_1	6	3.795	0.6326	5	0	0	0	1	0	Hemoglobin subunit alpha	NONE	P01958	NONE	NONE	NONE
3e4e_A_cavity_6	6	3.772	0.6286	5	0	1	0	0	0	Cytochrome P450 2E1	OXIDOREDUCTASE	CP2E1_HUMAN	Metabolizes several precarcinogens, drugs, and solvents to reactive metabolites. Inactivates a number of drugs and xenobiotics and also bioactivates many xenobiotic substrates to their hepatotoxic or carcinogenic forms.	NONE	NONE
2bj3_A_cavity_1	6	3.771	0.6284	6	0	0	0	0	0	Putative nickel-responsive regulator	NONE	O58316	Involved in DNA binding	NONE	NONE
2p63_B_cavity_1	6	3.758	0.6264	6	0	0	0	0	0	Cell division control protein 4	NONE	P07834	NONE	NONE	NONE
2qnc_B_cavity_2	6	3.747	0.6245	6	0	0	0	0	0	Recombination endonuclease VII	NONE	P13340	NONE	NONE	NONE
1sgm_B_cavity_1	6	3.74	0.6234	4	1	0	1	0	0	Uncharacterized HTH-type transcriptional regulator yxaF	NONE	P42105	NONE	NONE	NONE
2w4o_A_cavity_1	6	3.739	0.6232	5	0	0	1	0	0	Calcium/calmodulin-dependent protein kinase type IV	NONE	Q16566	NONE	NONE	NONE
1ahj_F_cavity_2	6	3.735	0.6225	6	0	0	0	0	0	Nitrile hydratase subunit alpha	NONE	P13448	NONE	NONE	NONE
2z3x_A_cavity_1	6	3.73	0.6217	5	1	0	0	0	0	Small, acid-soluble spore protein C	NONE	P02958	NONE	NONE	NONE
1co6_A_cavity_1	6	3.722	0.6203	5	1	0	0	0	0	Cytochrome c2	NONE	P00083	Involved in iron ion binding	NONE	NONE
1mj4_A_cavity_1	7	4.336	0.6194	6	1	0	0	0	0	Sulfite oxidase, mitochondrial	NONE	P51687	NONE	NONE	NONE
3dh4_D_cavity_3	6	3.716	0.6193	6	0	0	0	0	0	Sodium/glucose cotransporter	TRANSPORT PROTEIN	SGLT_VIBPA	Actively transports glucose into cells by Na(+) cotransport (By similarity).	NONE	Diabetes mellitus;Non-insulin dependent diabetes;Obesity
1s40_A_cavity_2	6	3.711	0.6184	4	1	0	0	1	0	Cell division control protein 13	NONE	P32797	NONE	NONE	NONE
1yvw_A_cavity_1	6	3.694	0.6157	6	0	0	0	0	0	Phosphoribosyl-ATP pyrophosphatase	NONE	Q81G00	NONE	NONE	NONE
2z6e_C_cavity_2	5	3.069	0.6137	4	1	0	0	0	0	Disheveled-associated activator of morphogenesis 1	NONE	Q9Y4D1	NONE	NONE	NONE
1f0o_A_cavity_1	6	3.678	0.613	5	0	1	0	0	0	Type-2 restriction enzyme PvuII	NONE	P23657	NONE	NONE	NONE
1to6_A_cavity_3	6	3.668	0.6113	6	0	0	0	0	0	Glycerate kinase	NONE	P57098	NONE	NONE	NONE
2gsq_A_cavity_1	6	3.666	0.611	5	0	1	0	0	0	Glutathione S-transferase	NONE	P46088	Involved in glutathione transferase activity	NONE	NONE
1xvi_A_cavity_1	6	3.659	0.6099	5	0	1	0	0	0	Putative mannosyl-3-phosphoglycerate phosphatase	NONE	P76329	Involved in catalytic activity	NONE	NONE
1n8w_A_cavity_3	7	4.268	0.6098	6	1	0	0	0	0	Malate synthase G	NONE	P0A5J4	Energy production and conversion	NONE	NONE
2zme_A_cavity_1	6	3.655	0.6092	5	1	0	0	0	0	Vacuolar-sorting protein SNF8	NONE	Q96H20	NONE	NONE	NONE
1cz5_A_cavity_3	6	3.653	0.6088	5	0	1	0	0	0	VCP-like ATPase	NONE	O05209	NONE	NONE	NONE
2daf_A_cavity_1	7	4.259	0.6084	5	0	1	1	0	0	IQ and ubiquitin-like domain-containing protein	NONE	Q8NA54	NONE	NONE	NONE
1c8v_A_cavity_3	6	3.644	0.6073	4	0	1	1	0	0	Tryptophan synthase alpha chain	NONE	P00929	NONE	NONE	NONE
1twu_A_cavity_1	6	3.629	0.6048	5	1	0	0	0	0	Uncharacterized protein yycE	NONE	P37479	NONE	NONE	NONE
1ll0_A_cavity_1	7	4.225	0.6036	6	1	0	0	0	0	Glycogenin-1	NONE	P13280	Involved in transferase activity, transferring hexosyl groups	NONE	NONE
1t3e_A_cavity_1	6	3.62	0.6033	5	0	1	0	0	0	Glycine receptor subunit beta	NONE	P48167	Involved in extracellular-glycine-gated chloride channel activity	NONE	Supplemental glycine may have antispastic activity. Very early findings suggest it may also have antipsychotic activity as well as antioxidant and anti-inflammatory activities.
2zc6_B_cavity_2	6	3.62	0.6033	5	0	1	0	0	0	Penicillin-binding protein 1A	NONE	Q04707	NONE	NONE	NONE
1a4e_A_cavity_2	7	4.219	0.6027	6	1	0	0	0	0	Peroxisomal catalase A	NONE	P15202	Involved in catalase activity	NONE	NONE
2ccy_A_cavity_1	6	3.609	0.6015	5	0	0	0	1	0	Cytochrome c	NONE	P00152	NONE	NONE	NONE
1k8g_B_cavity_2	6	3.607	0.6011	4	0	1	0	1	0	Telomere-binding protein subunit alpha	NONE	P29549	NONE	NONE	NONE
1zag_D_cavity_1	6	3.604	0.6006	4	1	0	1	0	0	Zinc-alpha-2-glycoprotein	LIPID MOBILIZATION FACTOR	ZA2G_HUMAN	Stimulates lipid degradation in adipocytes and causes the extensive fat losses associated with some advanced cancers. May bind polyunsaturated fatty acids.	NONE	NONE
1xvv_A_cavity_3	5	2.999	0.5999	4	0	1	0	0	0	Crotonobetainyl-CoA:carnitine CoA-transferase	NONE	P31572	Energy production and conversion	NONE	NONE
2ch5_A_cavity_2	5	2.998	0.5997	4	0	1	0	0	0	N-acetyl-D-glucosamine kinase	NONE	Q9UJ70	NONE	NONE	NONE
1onf_A_cavity_6	5	2.998	0.5996	4	1	0	0	0	0	Glutathione reductase	NONE	Q94655	Involved in oxidoreductase activity	NONE	NONE
1ar1_B_cavity_1	5	2.997	0.5994	4	0	1	0	0	0	Cytochrome c oxidase subunit 1-beta	NONE	P98002	NONE	NONE	NONE
2cy3_A_cavity_1	6	3.594	0.599	4	0	1	1	0	0	Cytochrome c3, 13 kDa	NONE	P00136	Involved in iron ion binding	NONE	NONE
1l1l_B_cavity_4	5	2.995	0.599	4	0	1	0	0	0	Adenosylcobalamin-dependent ribonucleoside-triphosphate reductase	NONE	Q59490	NONE	NONE	NONE
1ivh_A_cavity_1	5	2.995	0.599	3	0	1	1	0	0	Isovaleryl-CoA dehydrogenase, mitochondrial	NONE	P26440	Lipid transport and metabolism	NONE	NONE
3ch6_E_cavity_2	5	2.995	0.5989	4	0	1	0	0	0	Corticosteroid 11-beta-dehydrogenase isozyme 1	OXIDOREDUCTASE	DHI1_HUMAN	Catalyzes reversibly the conversion of cortisol to the inactive metabolite cortisone. Catalyzes reversibly the conversion of 7-ketocholesterol to 7-beta-hydroxycholesterol. In intact cells, the reaction runs only in one direction, from 7- ketocholesterol	Defects in HSD11B1 are a cause of cortisone reductase deficiency (CRD) [MIM:604931]. In CRD, activation of cortisone to cortisol does not occur, resulting in adrenocorticotropin-mediated androgen excess and a phenotype resembling polycystic ovary syndrome (PCOS).	Non-insulin dependent diabetes;Rheumatoid arthritis;Diabetes mellitus;Obesity;Atherosclerosis;Metabolic disorder;Periodontitis
3crw_1_cavity_2	5	2.994	0.5987	4	0	1	0	0	0	ATP-dependent DNA helicase Saci_0192	NONE	Q4JC68	NONE	NONE	NONE
2b5s_B_cavity_1	5	2.994	0.5987	4	0	1	0	0	0	Non-specific lipid-transfer protein 1	NONE	P81402	NONE	NONE	NONE
1myp_B_cavity_2	5	2.993	0.5987	4	0	1	0	0	0	Myeloperoxidase	MYELOPEROXIDASE	PERM_HUMAN	Part of the host defense system of polymorphonuclear leukocytes. It is responsible for microbicidal activity against a wide range of organisms. In the stimulated PMN, MPO catalyzes the production of hypohalous acids, primarily hypochlorous acid in physiol	Defects in MPO are the cause of myeloperoxidase deficiency (MPD) [MIM:254600]. MPD is an autosomal recessive defect that results in disseminated candidiasis.	NONE
2raw_B_cavity_1	5	2.993	0.5987	4	0	1	0	0	0	Baculoviral IAP repeat-containing protein 5	CELL CYCLE	BIRC5_HUMAN	May play a role in neoplasia. May counteract a default induction of apoptosis in G2/M phase. Interacts with tubulin. Inhibitor of caspase-3 and caspase-7. Component of the chromosomal passenger complex (CPC), a complex that acts as a key regulator of mito	NONE	Psoriasis;Alzheimers disease;Glioma;Cancer;Rheumatoid arthritis;Liver tumor;HIV infection;Head and neck tumor;Cervical dysplasia;Solid tumor
1fnc_A_cavity_2	5	2.993	0.5986	4	0	1	0	0	0	Ferredoxin--NADP reductase, chloroplastic	NONE	P00455	Inorganic ion transport and metabolism	NONE	NONE
3c7g_A_cavity_3	6	3.591	0.5985	4	1	0	1	0	0	Arabinoxylan arabinofuranohydrolase	NONE	Q45071	NONE	NONE	NONE
3dra_B_cavity_4	6	3.591	0.5984	5	0	1	0	0	0	Protein farnesyltransferase/geranylgeranyltransferase type-1 subunit alpha	NONE	Q9Y765	NONE	NONE	NONE
1bjf_A_cavity_1	5	2.991	0.5983	4	0	1	0	0	0	Neurocalcin-delta	NONE	P61602	NONE	NONE	NONE
1buc_B_cavity_2	5	2.99	0.5981	4	1	0	0	0	0	Acyl-CoA dehydrogenase, short-chain specific	NONE	Q06319	Involved in acyl-CoA dehydrogenase activity	NONE	NONE
2hmn_A_cavity_2	5	2.99	0.598	3	0	1	0	1	0	Naphthalene 1,2-dioxygenase subunit alpha	NONE	P0A111	NONE	NONE	NONE
2et1_A_cavity_2	5	2.989	0.5978	4	1	0	0	0	0	Oxalate oxidase 1	NONE	P45850	NONE	NONE	NONE
2uyy_B_cavity_2	5	2.987	0.5974	4	1	0	0	0	0	Putative oxidoreductase GLYR1	NONE	Q49A26	NONE	NONE	NONE
2fv4_B_cavity_1	5	2.986	0.5973	4	1	0	0	0	0	Kinetochore protein SPC25	NONE	P40014	NONE	NONE	NONE
2ayi_C_cavity_2	6	3.582	0.5971	5	0	1	0	0	0	Aminopeptidase T	NONE	P42778	NONE	NONE	NONE
2r46_B_cavity_4	5	2.985	0.5969	4	0	1	0	0	0	Aerobic glycerol-3-phosphate dehydrogenase	NONE	P13035	NONE	NONE	NONE
1qls_A_cavity_1	7	4.178	0.5968	7	0	0	0	0	0	Annexin A1	COMPLEX (LIGAND/ANNEXIN)	ANXA1_HUMAN	Calcium/phospholipid-binding protein which promotes membrane fusion and is involved in exocytosis. This protein regulates phospholipase A2 activity. It seems to bind from two to four calcium ions with high affinity.	NONE	Cancer
1p9o_B_cavity_5	5	2.983	0.5967	3	0	1	1	0	0	Phosphopantothenate--cysteine ligase	NONE	Q9HAB8	NONE	NONE	NONE
1bwy_A_cavity_1	5	2.983	0.5966	3	0	0	0	2	0	Fatty acid-binding protein, heart	NONE	P10790	NONE	NONE	NONE
1h99_A_cavity_2	6	3.579	0.5965	5	1	0	0	0	0	Transcription antiterminator licT	NONE	P39805	Involved in RNA binding	NONE	NONE
1ny9_A_cavity_1	5	2.982	0.5964	4	0	1	0	0	0	HTH-type transcriptional activator tipA	NONE	P0A4T9	NONE	NONE	NONE
1vl7_A_cavity_1	5	2.981	0.5963	3	0	1	0	1	0	Alr5027 protein	NONE	Q8YMA7	Involved in FMN binding	NONE	NONE
2hjs_A_cavity_1	5	2.981	0.5962	4	1	0	0	0	0	USG-1 protein homolog	NONE	O87014	NONE	NONE	NONE
1b7a_B_cavity_1	5	2.98	0.596	3	0	1	0	1	0	Phosphatidylethanolamine-binding protein 1	NONE	P13696	HCNP may be involved in the function of the presynaptic cholinergic neurons of the central nervous system. HCNP increases the production of choline acetyltransferase but not acetylcholinesterase. Seems to be mediated by a specific receptor	NONE	NONE
2wa0_A_cavity_2	5	2.98	0.596	4	0	1	0	0	0	Melanoma-associated antigen 4	NONE	P43358	NONE	NONE	NONE
1pkx_A_cavity_2	5	2.98	0.596	4	0	1	0	0	0	Bifunctional purine biosynthesis protein PURH	TRANSFERASE, HYDROLASE	PUR9_HUMAN	NONE	Defects in ATIC are the cause of AICA-ribosuria [MIM:608688]; also known as AICA-ribosiduria. AICA-ribosuria is a neurologically devastating inborn error of purine biosynthesis. AICA-ribosuria patients excrete massive amounts of AICA-riboside in the urine and accumulate AICA-ribotide and its derivatives in erythrocytes and fibroblasts. AICA-ribosuria causes profound mental retardation, epilepsy, …	NONE
1s99_B_cavity_2	5	2.978	0.5957	4	1	0	0	0	0	Putative HMP/thiamine-binding protein ykoF	NONE	O34911	NONE	NONE	NONE
1ukf_A_cavity_1	6	3.573	0.5955	4	1	0	0	1	0	Cysteine protease avirulence protein avrPphB	NONE	Q52430	NONE	NONE	NONE
1v1s_D_cavity_3	5	2.975	0.595	4	1	0	0	0	0	2-keto-3-deoxy-gluconate kinase	NONE	Q746L7	Involved in ribokinase activity	NONE	NONE
1qcb_F_cavity_1	6	3.57	0.5949	5	1	0	0	0	0	Heat-labile enterotoxin IIB, B chain	NONE	P43529	NONE	NONE	NONE
1jey_A_cavity_5	5	2.974	0.5949	4	0	1	0	0	0	ATP-dependent DNA helicase 2 subunit 1	NONE	P12956	NONE	NONE	NONE
3fsl_F_cavity_1	5	2.974	0.5948	3	0	1	1	0	0	Aromatic-amino-acid aminotransferase	NONE	P04693	NONE	NONE	NONE
1qu3_A_cavity_5	5	2.974	0.5948	4	0	1	0	0	0	Isoleucyl-tRNA synthetase	LIGASE/RNA	SYI1_STAAU	Catalyzes the attachment of isoleucine to tRNA(Ile). As IleRS can inadvertently accommodate and process structurally similar amino acids such as valine, to avoid such errors it has two additional distinct tRNA(Ile)-dependent editing activities. One activi	NONE	NONE
1k44_E_cavity_1	6	3.567	0.5944	4	1	0	0	1	0	Nucleoside diphosphate kinase	NONE	P84284	NONE	NONE	NONE
1buo_A_cavity_1	5	2.972	0.5944	4	0	1	0	0	0	Zinc finger and BTB domain-containing protein 16	NONE	Q05516	NONE	NONE	NONE
2ols_A_cavity_2	6	3.565	0.5942	5	1	0	0	0	0	Phosphoenolpyruvate synthase	NONE	Q9K0I2	NONE	NONE	NONE
2bsi_A_cavity_1	5	2.97	0.5941	4	0	1	0	0	0	Chaperone protein sycT	NONE	P0C2V9	NONE	NONE	NONE
1pul_A_cavity_1	5	2.969	0.5939	4	1	0	0	0	0	TPPP family protein C32E8.3	NONE	P91127	NONE	NONE	NONE
1lsh_A_cavity_5	5	2.969	0.5937	4	1	0	0	0	0	Vitellogenin	NONE	Q91062	NONE	NONE	NONE
2jpe_A_cavity_1	6	3.56	0.5933	5	1	0	0	0	0	Nuclear inhibitor of protein phosphatase 1	NONE	Q8R3G1	NONE	NONE	NONE
1qx4_A_cavity_2	6	3.559	0.5932	5	1	0	0	0	0	NADH-cytochrome b5 reductase 3	NONE	P20070	Involved in oxidoreductase activity	NONE	NONE
1zyi_A_cavity_3	8	4.744	0.593	8	0	0	0	0	0	Methylosome subunit pICln	NONE	P35521	NONE	NONE	NONE
2bcg_G_cavity_1	7	4.146	0.5923	7	0	0	0	0	0	Rab GDP-dissociation inhibitor	NONE	P39958	NONE	NONE	NONE
3bid_G_cavity_1	6	3.543	0.5905	5	0	1	0	0	0	UPF0339 protein NMA1193/NMA1859	NONE	Q9JRE9	NONE	NONE	NONE
2qbv_A_cavity_1	6	3.543	0.5905	5	0	1	0	0	0	Uncharacterized protein Rv0948c/MT0975	NONE	P64767	NONE	NONE	NONE
1kvd_B_cavity_1	6	3.541	0.5902	5	1	0	0	0	0	Salt-mediated killer protoxin 1	NONE	P19972	NONE	NONE	NONE
1hj1_A_cavity_1	6	3.536	0.5893	4	1	0	1	0	0	Estrogen receptor beta	NONE	Q62986	Involved in transcription factor activity	NONE	NONE
1e77_A_cavity_1	6	3.535	0.5891	5	0	1	0	0	0	Glucose-6-phosphate 1-dehydrogenase	NONE	P11411	Carbohydrate transport and metabolism	NONE	NONE
2gl8_C_cavity_1	6	3.531	0.5886	5	0	1	0	0	0	Retinoic acid receptor RXR-gamma	HORMONE/GROWTH FACTOR RECEPTOR	RXRG_HUMAN	Nuclear hormone receptor. Involved in the retinoic acid response pathway. Binds 9-cis retinoic acid (9C-RA) (By similarity).	NONE	NONE
1qb2_A_cavity_1	9	5.285	0.5873	9	0	0	0	0	0	Signal recognition particle 54 kDa protein	NONE	P61011	NONE	NONE	NONE
2k8f_A_cavity_1	6	3.523	0.5872	5	0	1	0	0	0	Histone acetyltransferase p300	NONE	Q09472	NONE	NONE	NONE
1h9t_A_cavity_3	6	3.514	0.5856	5	0	1	0	0	0	Fatty acid metabolism regulator protein	NONE	P0A8V6	NONE	NONE	NONE
1xap_A_cavity_1	6	3.509	0.5849	5	1	0	0	0	0	Retinoic acid receptor beta	TRANSCRIPTION	RARB_HUMAN	This is a receptor for retinoic acid. This metabolite has profound effects on vertebrate development. Retinoic acid is a morphogen and is a powerful teratogen. This receptor controls cell function by directly regulating gene expression.	NONE	Psoriasis;Acne;Cancer
2acm_B_cavity_1	7	4.088	0.584	6	1	0	0	0	0	Mucin-1	NONE	P15941	NONE	NONE	NONE
1oil_A_cavity_1	11	6.418	0.5834	11	0	0	0	0	0	Lipase	NONE	P22088	NONE	NONE	NONE
2k8y_A_cavity_1	7	4.083	0.5833	6	1	0	0	0	0	Uncharacterized protein MJ0187	NONE	Q57646	NONE	NONE	NONE
1k20_A_cavity_2	6	3.483	0.5805	5	0	0	0	1	0	Probable manganese-dependent inorganic pyrophosphatase	NONE	P95765	NONE	NONE	NONE
2d2m_A_cavity_1	6	3.474	0.579	4	0	1	0	1	0	Extracellular giant hemoglobin major globin subunit A1	NONE	Q7M419	NONE	NONE	NONE
1b0n_B_cavity_1	7	4.049	0.5784	6	1	0	0	0	0	HTH-type transcriptional regulator sinR	NONE	P06533	NONE	NONE	NONE
1js6_B_cavity_2	7	4.041	0.5772	7	0	0	0	0	0	Aromatic-L-amino-acid decarboxylase	NONE	P80041	Catalyzes the decarboxylation of L-3,4-dihydroxyphenylalanine (DOPA) to dopamine, L-5-hydroxytryptophan to serotonin and L-tryptophan to tryptamine.	NONE	NONE
2qv6_C_cavity_1	6	3.462	0.577	5	1	0	0	0	0	GTP cyclohydrolase III	NONE	Q57609	NONE	NONE	NONE
2k2q_A_cavity_2	6	3.45	0.575	5	1	0	0	0	0	Tyrocidine synthetase 3	NONE	O30409	NONE	NONE	NONE
1tdj_A_cavity_3	6	3.443	0.5738	4	0	1	1	0	0	Threonine dehydratase biosynthetic	NONE	P04968	Catalyzes the anaerobic formation of alpha-ketobutyrate and ammonia from threonine in a two-step reaction. The first step involved a dehydration of threonine and a production of enamine intermediates (aminocrotonate), which tautomerizes to its imine form (iminobutyrate). Both intermediates are unstable and short-lived. The second step is the nonenzymatic hydrolysis of the enamine/imine intermedia…	NONE	NONE
2j6y_D_cavity_1	6	3.423	0.5706	5	0	1	0	0	0	Phosphoserine phosphatase rsbU	NONE	P40399	NONE	NONE	NONE
3cuo_A_cavity_1	6	3.421	0.5701	5	1	0	0	0	0	Probable HTH-type transcriptional regulator ygaV	NONE	P77295	NONE	NONE	NONE
2d3o_1_cavity_1	6	3.413	0.5688	5	0	1	0	0	0	Trigger factor	NONE	Q9RT21	NONE	NONE	NONE
2j4k_A_cavity_4	6	3.403	0.5672	5	1	0	0	0	0	Uridylate kinase	NONE	Q97ZE2	NONE	NONE	NONE
3ibv_B_cavity_1	6	3.399	0.5665	5	1	0	0	0	0	Exportin-T	NONE	O94258	NONE	NONE	NONE
1cfp_A_cavity_1	6	3.398	0.5663	5	1	0	0	0	0	Protein S100-B	NONE	P02638	NONE	NONE	NONE
1a8p_A_cavity_1	7	3.958	0.5654	6	1	0	0	0	0	Ferredoxin--NADP reductase	NONE	Q44532	Involved in oxidoreductase activity	NONE	NONE
1t3w_B_cavity_1	6	3.385	0.5641	5	1	0	0	0	0	DNA primase	NONE	P0ABS5	NONE	NONE	NONE
2iuk_B_cavity_1	7	3.944	0.5635	5	1	0	1	0	0	Seed lipoxygenase	NONE	P24095	NONE	NONE	NONE
1yf2_B_cavity_6	6	3.372	0.562	5	0	1	0	0	0	Type-1 restriction enzyme MjaXIP specificity protein	NONE	Q57594	NONE	NONE	NONE
1aq0_B_cavity_1	7	3.933	0.5618	6	0	0	1	0	0	Lichenase-2	NONE	P12257	Involved in hydrolase activity, hydrolyzing O-glycosyl compounds	NONE	NONE
2i36_B_cavity_1	6	3.37	0.5617	5	1	0	0	0	0	Rhodopsin	NONE	P02699	NONE	NONE	NONE
3g73_B_cavity_1	6	3.366	0.5609	5	0	1	0	0	0	Forkhead box protein M1	NONE	Q08050	NONE	NONE	NONE
2oif_A_cavity_1	7	3.925	0.5607	6	0	0	0	1	0	Non-symbiotic hemoglobin	NONE	Q42831	NONE	NONE	NONE
2p06_A_cavity_1	6	3.354	0.559	5	0	1	0	0	0	Uncharacterized protein AF_0060	NONE	O30176	NONE	NONE	NONE
3dwl_D_cavity_1	7	3.908	0.5583	6	0	0	0	1	0	Actin-related protein 3	NONE	P32390	NONE	NONE	NONE
3fz7_F_cavity_2	7	3.898	0.5568	5	0	1	1	0	0	Glutamate decarboxylase beta	NONE	P69910	NONE	NONE	NONE
1qca_A_cavity_1	7	3.897	0.5567	7	0	0	0	0	0	Chloramphenicol acetyltransferase 3	NONE	P00484	Involved in chloramphenicol O-acetyltransferase activity	NONE	Used in treatment of cholera, as it destroys the vibrios and decreases the diarrhea. It is effective against tetracycline-resistant vibrios. It is also used in eye drops or ointment to treat bacterial conjunctivitis.
2zu6_D_cavity_2	6	3.34	0.5567	5	1	0	0	0	0	Eukaryotic initiation factor 4A-I	NONE	P60842	NONE	NONE	NONE
3cz8_B_cavity_3	7	3.89	0.5557	6	1	0	0	0	0	Putative sporulation-specific glycosylase ydhD	NONE	O05495	NONE	NONE	NONE
1yi5_I_cavity_1	7	3.884	0.5549	5	0	1	1	0	0	Acetylcholine-binding protein	NONE	P58154	Involved in extracellular ligand-gated ion channel activity	NONE	For the relief of nicotine withdrawal symptoms and as an aid to smoking cessation.
1tvm_A_cavity_1	7	3.879	0.5542	7	0	0	0	0	0	Galactitol-specific phosphotransferase enzyme IIB component	NONE	P0A436	NONE	NONE	NONE
1gka_B_cavity_1	7	3.875	0.5535	6	0	1	0	0	0	Crustacyanin-A1 subunit	NONE	P58989	Involved in binding	NONE	NONE
1moh_A_cavity_1	8	4.416	0.552	6	0	1	0	1	0	Hemoglobin-1	NONE	P41260	Involved in iron ion binding	NONE	NONE
1bin_B_cavity_1	7	3.864	0.552	6	0	0	0	1	0	Leghemoglobin A	NONE	P02238	Involved in iron ion binding	NONE	NONE
1xs8_A_cavity_1	6	3.308	0.5513	5	1	0	0	0	0	Probable Fe(2+)-trafficking protein	NONE	P67617	NONE	NONE	NONE
2qvl_A_cavity_1	7	3.856	0.5509	6	1	0	0	0	0	Diacylglycerol kinase	NONE	Q6GFF9	NONE	NONE	NONE
1vrb_B_cavity_3	6	3.305	0.5508	3	2	0	0	1	0	Uncharacterized protein yxbC	NONE	P46327	NONE	NONE	NONE
1n97_A_cavity_2	7	3.847	0.5496	6	1	0	0	0	0	Cytochrome P450	NONE	Q746J6	Involved in monooxygenase activity	NONE	NONE
3bom_B_cavity_1	7	3.847	0.5496	6	0	0	0	1	0	Hemoglobin subunit alpha-4	NONE	P14527	NONE	NONE	NONE
1s5a_A_cavity_1	7	3.847	0.5496	3	1	1	2	0	0	Hypothetical protein yesE	NONE	O31511	NONE	NONE	NONE
1opg_H_cavity_1	6	3.298	0.5496	5	0	0	0	1	0	Ig gamma-1 chain C region secreted form	NONE	P01868	NONE	NONE	NONE
2cqe_A_cavity_1	8	4.396	0.5495	6	0	1	1	0	0	Zinc finger CCCH domain-containing protein 4	NONE	Q9UPT8	NONE	NONE	NONE
1ud1_C_cavity_2	7	3.843	0.549	6	1	0	0	0	0	Glycinin G1	NONE	P04776	NONE	NONE	NONE
1h9u_D_cavity_1	6	3.29	0.5484	4	0	1	1	0	0	Retinoic acid receptor RXR-beta	NUCLEAR RECEPTOR	RXRB_HUMAN	Nuclear hormone receptor. Involved in the retinoic acid response pathway. Binds 9-cis retinoic acid (9C-RA).	NONE	NONE
1ar4_B_cavity_1	6	3.29	0.5483	5	0	1	0	0	0	Superoxide dismutase [Mn/Fe]	NONE	P80293	NONE	NONE	NONE
1k9k_A_cavity_2	6	3.289	0.5482	4	0	1	1	0	0	Protein S100-A6	SIGNALING PROTEIN	S10A6_HUMAN	NONE	NONE	NONE
1or6_B_cavity_1	7	3.836	0.548	5	1	0	1	0	0	Heme-based aerotactic transducer hemAT	NONE	O07621	Involved in signal transducer activity	NONE	NONE
1w6j_A_cavity_4	7	3.831	0.5472	6	0	1	0	0	0	Lanosterol synthase	ISOMERASE	ERG7_HUMAN	Catalyzes the cyclization of (S)-2,3 oxidosqualene to lanosterol, a reaction that forms the sterol nucleus.	NONE	Hyperlipidemia;Hypercholesterolemia;Atherosclerosis
1xv9_D_cavity_1	7	3.83	0.5471	7	0	0	0	0	0	Nuclear receptor subfamily 1 group I member 3	DNA BINDING PROTEIN	NR1I3_HUMAN	Binds and transactivates the retinoic acid response elements that control expression of the retinoic acid receptor beta 2 and alcohol dehydrogenase 3 genes. Transactivates both the phenobarbital responsive element module of the human CYP2B6 gene and the C	NONE	NONE
2rfa_A_cavity_1	6	3.279	0.5465	5	1	0	0	0	0	Transient receptor potential cation channel subfamily V member 6	NONE	Q91WD2	NONE	NONE	NONE
1lqs_L_cavity_2	6	3.278	0.5464	5	0	1	0	0	0	Interleukin-10 receptor alpha chain	IMMUNE SYSTEM	I10R1_HUMAN	Receptor for IL10; binds IL10 with a high affinity.	NONE	NONE
1jtb_A_cavity_1	7	3.822	0.5461	6	0	1	0	0	0	Nonspecific lipid-transfer protein 1	NONE	P07597	Involved in lipid binding	NONE	NONE
1p4t_A_cavity_2	6	3.276	0.5461	5	1	0	0	0	0	Surface protein A	NONE	Q9RP17	Involved in porin activity	NONE	NONE
2cw0_C_cavity_5	8	4.367	0.5459	5	1	1	0	1	0	DNA-directed RNA polymerase subunit alpha	NONE	Q9Z9H6	NONE	NONE	NONE
1pn9_A_cavity_1	8	4.361	0.5452	6	0	0	2	0	0	Glutathione S-transferase 1, isoform D	NONE	Q93113	Posttranslational modification, protein turnover, chaperones	NONE	NONE
1eo8_H_cavity_1	7	3.815	0.545	6	1	0	0	0	0	Hemagglutinin	NONE	P03437	Involved in host cell surface receptor binding	NONE	NONE
1q8b_A_cavity_1	7	3.812	0.5445	4	0	1	1	1	0	Uncharacterized protein yjcS	NONE	O31641	NONE	NONE	NONE
1k1g_A_cavity_1	6	3.263	0.5439	5	0	1	0	0	0	Splicing factor 1	NONE	Q15637	NONE	NONE	NONE
3b68_A_cavity_1	7	3.807	0.5438	5	0	1	0	1	0	Androgen receptor	TRANSCRIPTION	ANDR_HUMAN	Steroid hormone receptors are ligand-activated transcription factors that regulate eukaryotic gene expression and affect cellular proliferation and differentiation in target tissues. Transcription factor activity is modulated by bound coactivator and core	Genetic variation in AR can be responsible of androgenetic alopecia (AGA) [MIM:109200].;Defects in AR are the cause of androgen insensibility syndrome (AIS) [MIM:300068]; previously known as testicular feminization syndrome (TFM). It can be complete (CAIS) when external genitalia are phenotypically female; or partial (PAIS) when external genitalia are substantively ambiguous or mild (MAIS) when e…	Hypoactive sexual desire disorder;Hepatitis B virus infection;Cardiac failure;Andrology;Hirsutism;Female sexual dysfunction;Psoriasis;Reperfusion injury;Plasmodium infection;Atherosclerosis;Prostate hyperplasia;Fatigue;Male sexual dysfunction;Autoimmune disease;Testosterone deficiency;Uterine fibroids;Metabolic disorder;Myalgia;Obesity;Gynecological disorder;Contraception;Cancer;Hypercholesterole…
2ju0_A_cavity_2	7	3.801	0.543	6	0	1	0	0	0	Calcium-binding protein NCS-1	NONE	Q06389	NONE	NONE	NONE
2spo_A_cavity_1	6	3.255	0.5426	5	0	0	0	1	0	Myoglobin	NONE	P02185	Involved in iron ion binding	NONE	NONE
3dof_B_cavity_1	6	3.252	0.5421	5	0	1	0	0	0	ADP-ribosylation factor-like protein 2	NONE	P36404	NONE	NONE	NONE
1gqm_E_cavity_1	7	3.794	0.542	6	0	1	0	0	0	Protein S100-A12	CALCIUM BINDING	S10AC_HUMAN	Calcitermin possesses antifungal activity against C.albicans and is also active against E.coli and P.aeruginosa but not L.monocytogenes and S.aureus.	NONE	NONE
2dtg_C_cavity_1	7	3.793	0.5418	6	1	0	0	0	0	Insulin receptor	HORMONE RECEPTOR/IMMUNE SYSTEM	INSR_HUMAN	This receptor binds insulin and has a tyrosine-protein kinase activity. Isoform Short has a higher affinity for insulin. Mediates the metabolic functions of insulin. Binding to insulin stimulates association of the receptor with downstream mediators inclu	Defects in INSR are the cause of insulin resistance (Ins resistance) [MIM:125853].;Defects in INSR are the cause of Rabson-Mendenhall syndrome [MIM:262190]; also known as Mendenhall syndrome. It is a severe insulin resistance syndrome characterized by insulin- resistant diabetes mellitus with pineal hyperplasia and somatic abnormalities. Typical features include coarse, senile-appearing facies, d…	Insulin dependent diabetes;Cancer;Non-insulin dependent diabetes;Infection;Parkinsons disease;Hypertension;Diabetes mellitus;Hyperinsulinemia
1u63_C_cavity_2	7	3.791	0.5415	5	0	1	1	0	0	50S ribosomal protein L1P	NONE	P54050	Translation, ribosomal structure and biogenesis	NONE	NONE
2cb2_D_cavity_5	6	3.247	0.5411	4	0	1	0	1	0	Sulfur oxygenase/reductase	NONE	P29082	NONE	NONE	NONE
1woj_A_cavity_1	7	3.783	0.5404	5	0	1	0	1	0	2,3-cyclic-nucleotide 3-phosphodiesterase	NONE	P09543	NONE	NONE	NONE
2bdr_B_cavity_1	7	3.782	0.5403	6	0	1	0	0	0	Ureidoglycolate hydrolase	NONE	P59285	NONE	NONE	NONE
1wdm_D_cavity_3	7	3.778	0.5397	6	0	1	0	0	0	Fatty acid oxidation complex subunit alpha	NONE	P28793	NONE	NONE	NONE
1ef8_C_cavity_3	8	4.313	0.5392	7	1	0	0	0	0	Methylmalonyl-CoA decarboxylase	NONE	P52045	Lipid transport and metabolism	NONE	NONE
1cz2_A_cavity_1	7	3.767	0.5381	6	0	1	0	0	0	Non-specific lipid-transfer protein	NONE	P24296	Involved in lipid binding	NONE	NONE
2vv5_F_cavity_2	7	3.76	0.5371	6	1	0	0	0	0	Small-conductance mechanosensitive channel	MEMBRANE PROTEIN	MSCS_ECOLI	Mechanosensitive channel that participates in the regulation of osmotic pressure changes within the cell, opening in response to stretch forces in the membrane lipid bilayer, without the need for other proteins. Forms an ion channel of 1.0 nanosiemens con;The channel pore is formed by TM3 and the loop between TM2 and TM3. After a sharp turn at Gly-113, an alpha-helix (residues 114-127) is oriente…	NONE	NONE
